# Supplementary material for: Decrease of Pneumococcal Community-Acquired Pneumonia Hospitalization and Associated Complications in Children after the Implementation of the 13-Valent Pneumococcal Conjugate Vaccine (PCV13) in Taiwan
Source: MDPI journal article supplement (doi:10.3390/vaccines9091043), 2021-09-18
Supplement: s1 [file s1]

**Supplementary Table S1.** Operational definitions.

| <b>Invasive procedures</b>             | <b>NHI<sup>1</sup> coding</b>                      |
|----------------------------------------|----------------------------------------------------|
| Thoracocentesis                        | 29012B                                             |
| Exploratory thoracotomy                | 67002B                                             |
| Chest intubation                       | 56010B                                             |
| Thoracoscopic Decortication of Pleura  | 67047B                                             |
| Computed tomography-guided aspiration  | 33103B                                             |
| Echo-guided aspiration                 | 19007B                                             |
| <b>Respiratory failure procedures</b>  | <b>NHI coding</b>                                  |
| Tracheal stent intubation              | 67046C                                             |
| Ventilator use                         | 57001B                                             |
| Non-invasive positive pressure support | 57023B                                             |
| Oxygen therapy                         | 57004C                                             |
| <b>Complications of pneumonia</b>      | <b>ICD-9<sup>2</sup>/ICD-10<sup>3</sup> coding</b> |
| pleural effusion                       | 511.9/J90                                          |
| Empyema                                | 510.9/J86.9                                        |
| necrotizing pneumonia                  | 513.0/J85.0                                        |
| pneumatocele                           | 518.89/J98.4                                       |
| lung abscess                           | 513.0/J85.1                                        |
| respiratory failure                    | 518.81/J96.9                                       |
| bacteremia or sepsis                   | 038.2/ R78.81, B95.3, A40.3                        |
| hemolytic uremic syndrome              | 283.11/D59.3                                       |

<sup>1</sup> NHI: National Health Insurance;

<sup>2</sup> ICD-9: International Classification of Diseases, 9<sup>th</sup> revision;

<sup>3</sup> ICD-10: International Classification of Diseases, 10<sup>th</sup> revision

**Supplementary Table S2.** The annual incidence<sup>1</sup> of pneumococcal and unspecific community acquired pneumonia hospitalization rate by age during 2005 to 2015.

|                          | 2005   | 2006   | 2007   | 2008   | 2009   | 2010   | 2011   | 2012   | 2013   | 2014   | 2015   |
|--------------------------|--------|--------|--------|--------|--------|--------|--------|--------|--------|--------|--------|
| <b>P-CAP</b>             |        |        |        |        |        |        |        |        |        |        |        |
| <b>&lt; 1 year</b>       | 79.5   | 101.5  | 102.9  | 88.5   | 100.5  | 144.8  | 116.6  | 136.8  | 153.5  | 126.9  | 110.8  |
| <b>1 year</b>            | 101.9  | 154.8  | 173.7  | 160.2  | 164.8  | 254.0  | 198.4  | 204.5  | 232.0  | 178.9  | 181.1  |
| <b>2~5 years</b>         | 109.3  | 134.2  | 142.8  | 157.6  | 154.1  | 232.9  | 194.7  | 222.7  | 171.1  | 138.3  | 141.4  |
| <b>6–18 years</b>        | 30.1   | 19.0   | 14.6   | 20.9   | 25.2   | 28.2   | 28.9   | 27.7   | 23.3   | 19.7   | 22.6   |
| <b>19–65 years</b>       | 3.2    | 2.6    | 3.0    | 3.5    | 3.1    | 3.6    | 3.2    | 3.1    | 3.3    | 2.9    | 2.8    |
| <b>66 years or older</b> | 33.0   | 32.0   | 35.3   | 37.9   | 30.6   | 34.0   | 31.5   | 32.0   | 33.2   | 27.6   | 23.6   |
| <b>U-CAP</b>             |        |        |        |        |        |        |        |        |        |        |        |
| <b>&lt; 1 year</b>       | 1421.4 | 1130.8 | 1010.6 | 879.9  | 731.0  | 916.2  | 800.6  | 696.4  | 663.5  | 677.3  | 693.1  |
| <b>1 year</b>            | 1734.2 | 1424.5 | 1356.8 | 1273.9 | 1065.2 | 1348.8 | 1222.5 | 1182.6 | 963.9  | 992.9  | 1030.5 |
| <b>2~5 years</b>         | 1149.2 | 919.3  | 877.9  | 890.6  | 827.5  | 1113.1 | 1024.7 | 865.5  | 669.1  | 791.4  | 848.1  |
| <b>6–18 years</b>        | 290.0  | 195.5  | 141.5  | 165.0  | 201.4  | 231.0  | 251.2  | 217.6  | 151.2  | 180.0  | 224.2  |
| <b>19–65 years</b>       | 212.5  | 182.5  | 189.2  | 205.4  | 201.8  | 250.7  | 258.2  | 245.6  | 241.2  | 234.5  | 247.9  |
| <b>66 years or older</b> | 3172.0 | 3020.4 | 3258.3 | 3396.1 | 3290.0 | 3863.2 | 3901.8 | 3804.3 | 3823.8 | 3659.7 | 3350.2 |

P-CAP: pneumococcal community-acquired pneumonia; U-CAP: unspecific community-acquired pneumonia

<sup>1</sup>Data are presented as admissions per 100,000 children-year

**Supplementary Table S3.** Estimated difference of hospitalization incidence rate between pre- (2005-2012) and post-vaccination period (2013-2016) among patients with pneumococcal or unspecific community acquired pneumonia by age groups. (with seasonality adjustment)

| Age groups        | P-CAP                                                     |                 |         |             | U-CAP                                        |                   |         |             |
|-------------------|-----------------------------------------------------------|-----------------|---------|-------------|----------------------------------------------|-------------------|---------|-------------|
|                   | Estimated difference of hospitalization rate <sup>1</sup> | 95 % CI         | p value | % of change | Estimated difference of hospitalization rate | 95 % CI           | p value | % of change |
| < 1 year          | -20.60                                                    | -30.8 to -10.4  | <0.01   | 44%         | 38.55                                        | -29.83 to 112.87  | 0.26    | 15%         |
| 1 year            | -18.50                                                    | -36.64 to -0.37 | 0.05    | 28%         | 83.93                                        | -0.66 to 181.43   | 0.05    | 24%         |
| 2~5 years         | -17.14                                                    | -26.77 to -7.52 | <0.01   | 37%         | 53.44                                        | -13.24 to 128.35  | 0.12    | 21%         |
| 6–18 years        | -1.53                                                     | -4.28 to 1.22   | 0.28    | 22%         | 26.76                                        | 0.78 to 56.85     | 0.05    | 50%         |
| 19–65 years       | -0.26                                                     | -0.44 to -0.08  | <0.01   | 28%         | -0.54                                        | -13.74 to 12.59   | 0.93    | 1%          |
| 66 years or older | -2.99                                                     | -4.36 to -1.62  | <0.01   | 35%         | -148.23                                      | -289.18 to -30.08 | 0.02    | 15%         |

P-CAP: pneumococcal community-acquired pneumonia; U-CAP: unspecific community-acquired pneumonia

<sup>1</sup> hospitalization rate: admission episodes per 100,000 person-years
